# Supplementary material for: A common origin of complex life cycles in parasitic flatworms: evidence from the complete mitochondrial genome of Microcotyle sebastis (Monogenea: Platyhelminthes)
Source: PubMed Central journal article supplement (PMC1800851; doi:10.1186/1471-2148-7-11), 2007-02-02

# Additional file 2

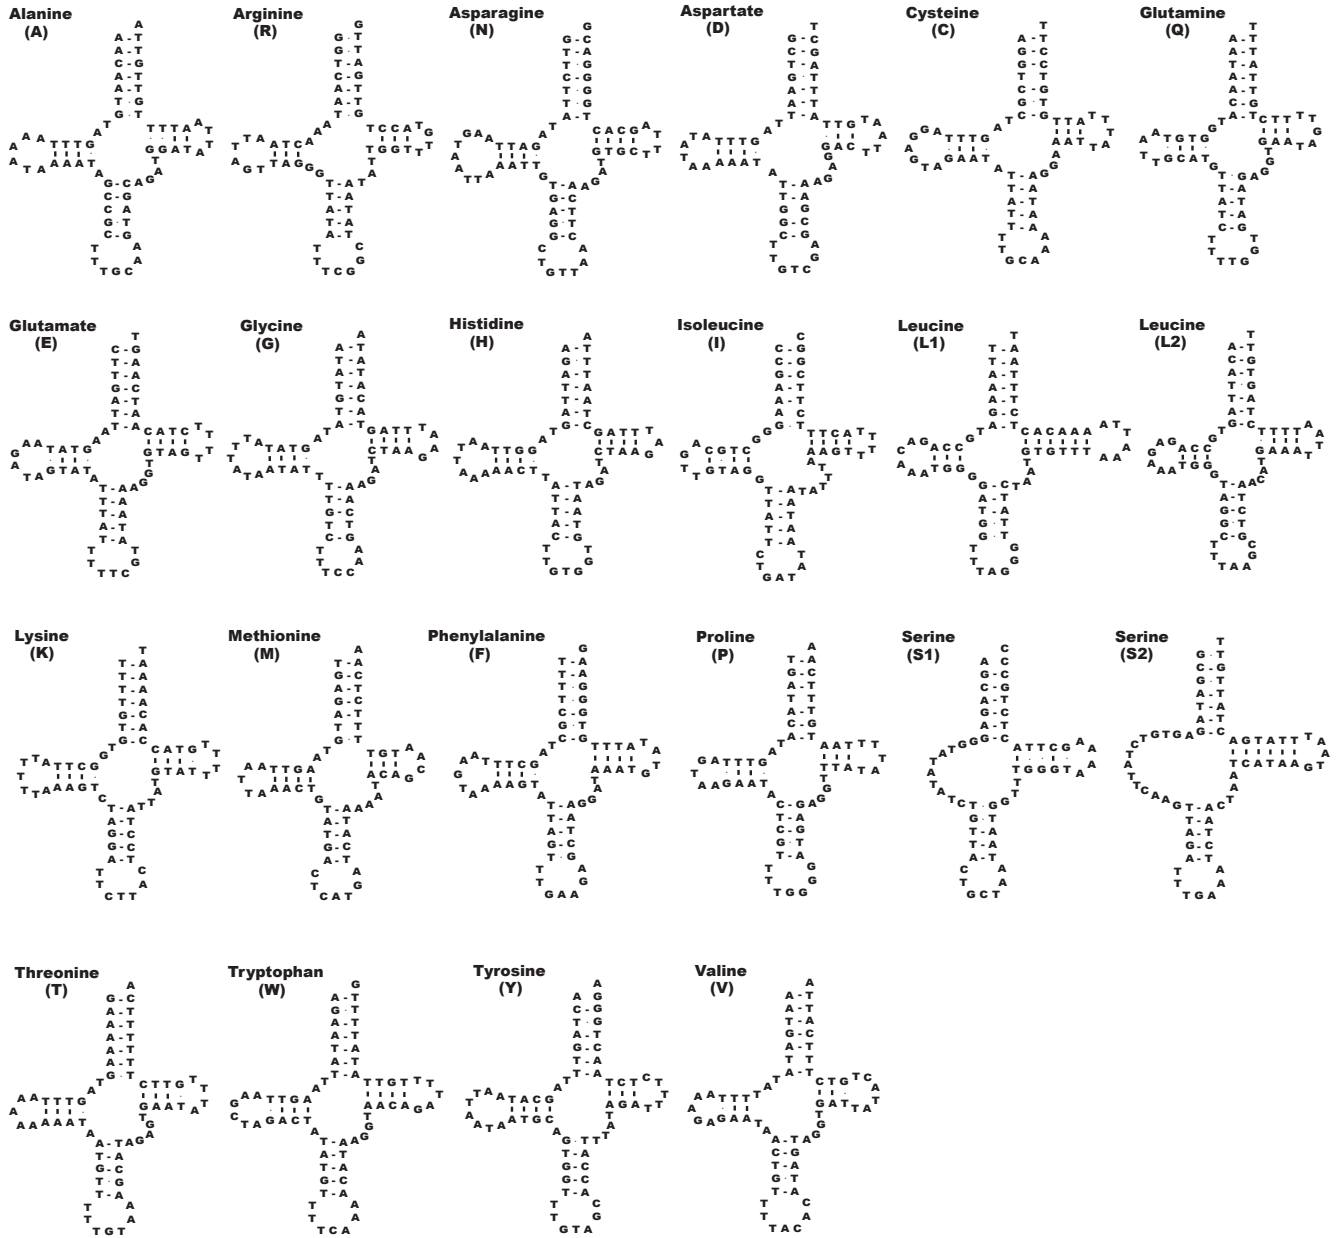

Supplement: 1471-2148-7-11-S2.pdf [file 1471-2148-7-11-S2.pdf]
